# Supplementary material for: A replicating RNA vaccine protects against lethal clade 2.3.4.4b influenza A H5N1 virus challenge in cynomolgus macaques
Source: Research Square preprint supplement (doi:10.21203/rs.3.rs-5723772/v1), 2025-01-06
Supplement: Supplementary file 1 [file 9c9eea9fbf1a929a48ed4174.pdf]

# Day -56

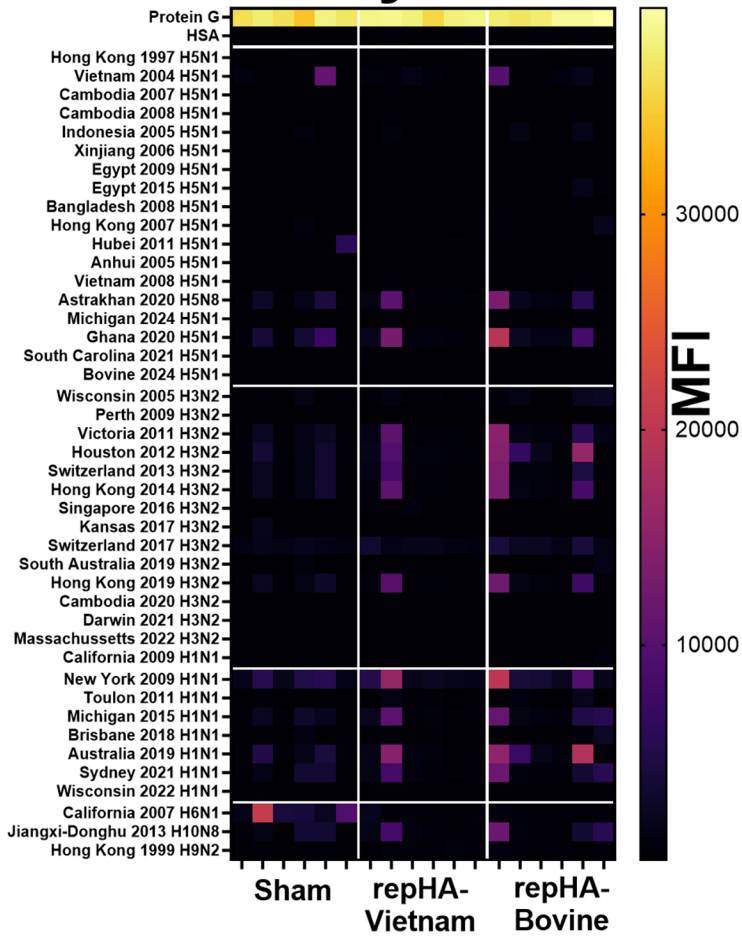

# Day 0

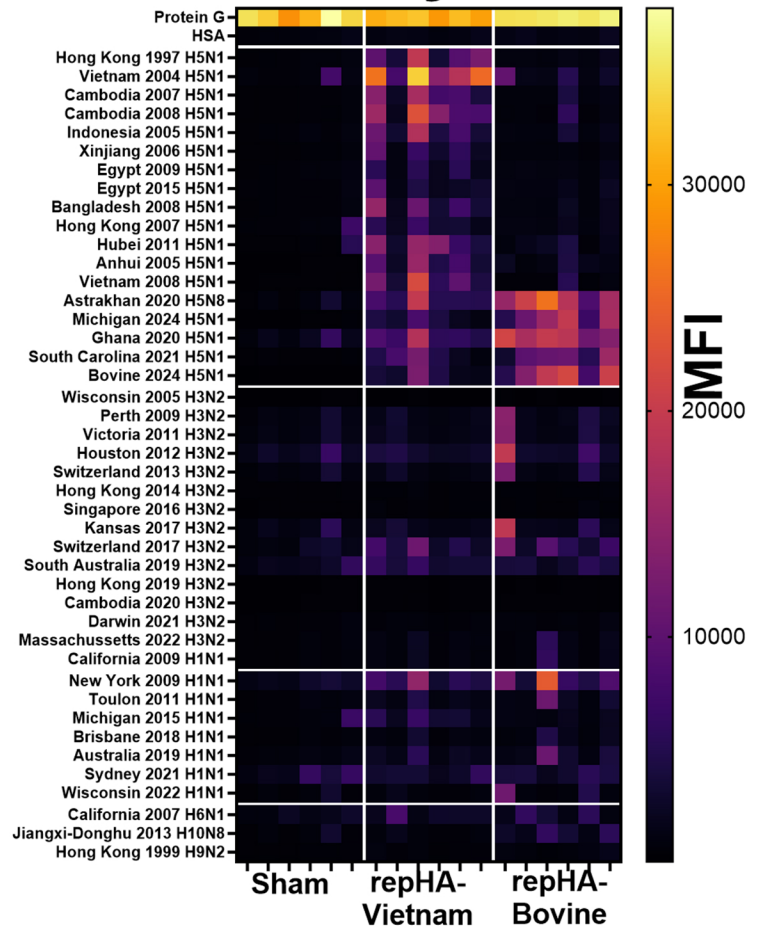

Supplemental Figure 1: Heterosubtypic immunity elicited by vaccination. At day -56, prior to vaccination or day 0, 4-weeks after boosting, binding antibodies to indicated HAs was measured by bead-based multiplex assay.

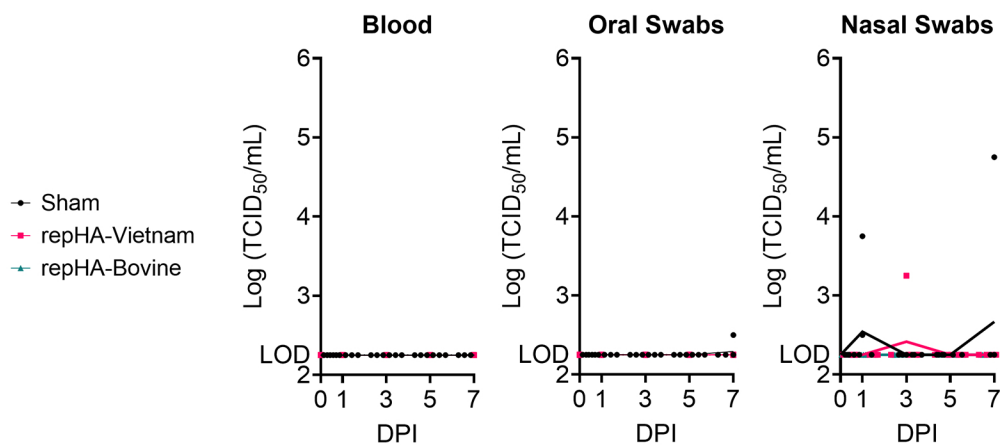

Supplemental Figure 2: Infectious virus in blood and swabs. Infectious virus in the blood or swabs was measured through day 7 and was only sporadically detected in some animals.
